# Supplementary material
Source: publisher figshare collection journal article supplement (https://tandf.figshare.com/articles/dataset/_/5697283)
Supplement: Supplementary file 1 [file 1]

Archive with 4 entries (4 files):
- tbbb_a_1413326_sm2390.xlsx
- tbbb_a_1413326_sm2389.xlsx
- tbbb_a_1413326_sm2387.docx
- tbbb_a_1413326_sm2386.pdf
