# Supplementary material
Source: publisher figshare collection journal article supplement (https://tandf.figshare.com/articles/dataset/_/5697283)
Supplement: Supplementary file 1 [file 1 › tbbb_a_1413326_sm2386.pdf]

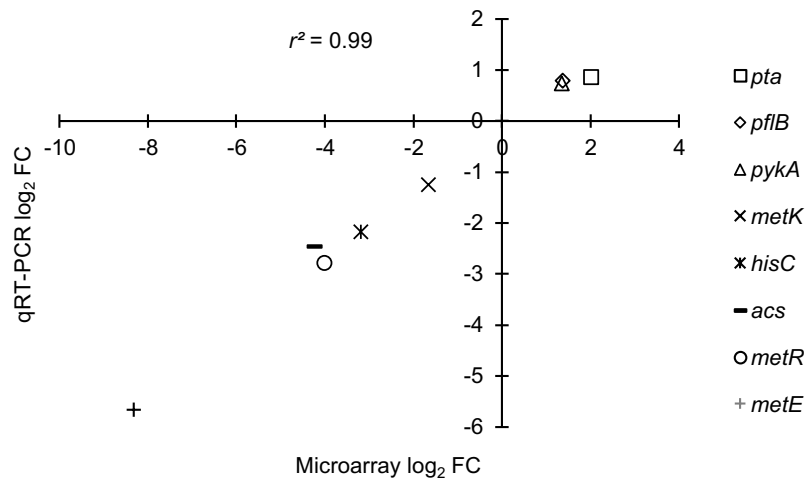

**Supplemental Fig. 1.** Comparison of transcriptional changes in strains WT and  $\Delta cpdA$  as determined by microarray and qRT-PCR analyses. Log<sub>2</sub>-transformed fold changes (Log<sub>2</sub> FC) in the expression levels of 8 selected genes determined by microarray were plotted against the values determined by qRT-PCR.
