# Supplementary material
Source: publisher figshare collection journal article supplement (https://tandf.figshare.com/articles/dataset/_/5697283)
Supplement: Supplementary file 1 [file 1 › tbbb_a_1413326_sm2387.docx]

**Supplementary Table 1.** Primers used in this study.

| Primer | Sequence (5′–3′) | For use |
| --- | --- | --- |
| cpdA_FO | CGTTTCTACTTTTATTGGGC | *cpdA* disruption |
| cpdA_5_OUT | GATCACTAGTGATTCATCACAGGCACAAGG | *cpdA* disruption |
| cpdA_5_IN | AACTTTGGTACCGATCACTTTCAGCACATTGAATACCC | *cpdA* disruption |
| cpdA_3_IN | GTGATCGGTACCAAAGTTGGTTATTAACGCGAATGACC | *cpdA* disruption |
| cpdA_3_OUT | GATCACTAGTCCTAAATGGTTAGGTCGGG | *cpdA* disruption |
| cpdA_RO | GCTTCATCGACACTGTTATC | *cpdA* disruption |
| cyaA_FO | CTAATAATGCTTTAACGCGC | *cyaA* disruption |
| cyaA_5_OUT | GATCACTAGTGAGATAAAGCTGGCGATACG | *cyaA* disruption |
| cyaA_5_IN | GGTAGCGTTGCTCACGCTATCCATCCTAGAACACAACAC | *cyaA* disruption |
| cyaA_3_IN | AGCGTGAGCAACGCTACCTTTTAAGCGGGAGCTACCTC | *cyaA* disruption |
| cyaA_3_OUT | GATCACTAGTGTACAGTGGCGTACCATAGG | *cyaA* disruption |
| cayA_RO | CGCATTATTAAAGGCATGCC | *cyaA* disruption |
| cyaB_FO | GATCTTAAGGCGATCTCAGG | *cyaB* disruption |
| cyaB_5_OUT | GATCACTAGTACTGCAGATCCACGATATCC | *cyaB* disruption |
| cyaB_5_IN | CTGAGCCACGATTGAGTTATTCATCAACAATCTCCATTTTTAC | *cyaB* disruption |
| cyaB_3_IN | AACTCAATCGTGGCTCAGCAATAATCGCTTTGCTGGG | *cyaB* disruption |
| cyaB_3_OUT | GGGATCACTAGTCGTAATCGCCACCATTCC | *cyaB* disruption |
| cayB_RO | AACCTTATTTGCACAGGTCG | *cyaB* disruption |
| cyaC_FO | CCCCTCAAAATCTGAGCG | *cyaC* disruption |
| cyaC_5_OUT | GATCACTAGTGCGCTAATATGATGGCAGG | *cyaC* disruption |
| cyaC_5_IN | AGCGCCGTTGGTACCTGATGCTCTCACAACGGGTTTTG | *cyaC* disruption |
| cyaC_3_IN | TCAGGTACCAACGGCGCTCCTTTATAAGACTCACAACAGG | *cyaC* disruption |
| cyaC_3_OUT | GATCACTAGTCGGTGAAGAAGTCGTACAG | *cyaC* disruption |
| cyaC_RO | CAGTTGATTGAACGTGACC | *cyaC* disruption |
| ScpdA_F_EcoRI | GGCCGGAATTCTGGCAGTCAACAACGTTTGG | *S. oneidensis cpdA* complementation |
| ScpdA_R_BamHI | GGCGCGGATCCTTCCTCAAGCTGCGGTCATT | *S. oneidensis cpdA* complementation |
| EcpdA_F_KpnI | GGGGGGTACCGCGATTCCGGTTTATTAGCG | *E. coli cpdA* complementation |
| EcpdA_R_BamHI | GGGGGGGATCCCGAGCTGTTGAAACCGTG | *E. coli cpdA* complementation |
| qRT-16S-F | AGCGCAACCCCTATCCTTAT | qRT-PCR for 16S rRNA gene |
| qRT-16S-R | CGTAAGGGCCATGATGACTT | qRT-PCR for 16S rRNA gene |
| qRT-pta-F | TAGGTGCCCTGCTGCTTACT | qRT-PCR for *pta* |
| qRT-pta-R | GAGGTTTGCCAAGTGTTGGT | qRT-PCR for *pta* |
| qRT-pflB-F | CCCAATGGTTGTGGGTAAAC | qRT-PCR for *pflB* |
| qRT-pflB-R | AGTGATTGGGTCTGCTTTGG | qRT-PCR for *pflB* |
| qRT-pykA-F | CAAAATCGTCACCACACTGG | qRT-PCR for *pykA* |
| qRT-pykA-R | TGAGTAGCGCGTTTGAGATG | qRT-PCR for *pykA* |
| qRT-metK-F | ATGCCAGCAACGAAACTGAC | qRT-PCR for *metK* |
| qRT-metK-R | ACTTGGCTTTTCGCATCTGG | qRT-PCR for *metK* |

**Supplementary Table 1.** Continued.

| Primer | Sequence (5′–3′) | For use |
| --- | --- | --- |
| qRT-hisC-F | AGCAAAATTGTCGCCAGTCG | qRT-PCR for *hisC* |
| qRT-hisC-R | AAAGGTTTGCGCGCTAATGG | qRT-PCR for *hisC* |
| qRT-acs-F | TAATCCAAAGGGCGTATTGC | qRT-PCR for *acs* |
| qRT-acs-R | AACCTACATCGGCCGTACAC | qRT-PCR for *acs* |
| qRT-metR-F | TCAGCTAAGGGTTGGGATTG | qRT-PCR for *metR* |
| qRT-metR-R | TTCTAGGGCATTGAGCCGAGT | qRT-PCR for *metR* |
| qRT-metE-F | GAAGGTGTGGGCTTTACCAA | qRT-PCR for *metE* |
| qRT-metE-R | AATCAACCGTCATGGCTTTC | qRT-PCR for *metE* |
