# Supplementary material
Source: publisher figshare collection journal article supplement (https://tandf.figshare.com/articles/dataset/_/5697283)
Supplement: Supplementary file 1 [file 1 › tbbb_a_1413326_sm2389.xlsx]

## Sheet: Supplementary Table 2
Supplementary Table 2. Up-regulated genes in ∆cpdA.
Locus tag	Gene	Description	log2FC
SO_0005	yidD	membrane insertion associated protein YidD	1.073
SO_0006	rnpA	ribonuclease P protein RnpA	1.15415
SO_0150	SO_0150	putative adhesin	1.8598
SO_0154	SO_0154	inner membrane protein of unknown function DUF893	1.70532
SO_0159	SO_0159	hypothetical protein	1.22946
SO_0334	SO_0334	protein of unknown function DUF1107	1.2654
SO_0341	SO_0341	multifunctional sensory protein/diguanylate cyclase/signalling protein with EAL domain	1.11529
SO_0439	SO_0439	hypothetical protein	1.01995
SO_0447	SO_0447	iron-regulated inner membrane protein	1.13913
SO_0449	SO_0449	iron-regulated inner membrane protein	1.05275
SO_0450	SO_0450	transporter MFS superfamily	1.19386
SO_0453	fklB	peptidyl-prolyl cis-trans isomerase FklB	1.19339
SO_0458	SO_0458	hypothetical protein	2.18701
SO_0525	rmrB	multidrug efflux pump permease component RmrB	1.15053
SO_0583	bfd	bacterioferritin-associated ferredoxin Bfd	1.20282
SO_0620	SO_0620	putative hydrolase involved in arginine and ornithine metabolism	1.14882
SO_0780	gcvH	glycine cleavage system carrier of aminomethyl moiety GcvH	1.14734
SO_0781	gcvP	glycine dehydrogenase (decarboxylating) GcvP	1.18663
SO_0787	SO_0787	hypothetical protein	1.20883
SO_0797	SO_0797	periplasmic thioredoxin-family protein	1.58945
SO_0798	SO_0798	TonB-dependent receptor	1.77942
SO_0837	blaA	class D carbapenem-hydrolyzing beta-lactamase BlaA	1.40924
SO_0844	SO_0844	hypothetical protein	1.00817
SO_0905	nqrD	Na-translocating NADH-quinone reductase subunit D NqrD	1.01438
SO_0906	nqrE	Na-translocating NADH-quinone reductase subunit E NqrE	1.10297
SO_0907	nqrF	Na-translocating NADH-quinone reductase subunit F NqrF	1.04846
SO_0916	SO_0916	bifunctional MarR family transcriptional regulator/acteyltransferase GNAT family	1.10742
SO_0932	pgk	phosphoglycerate kinase Pgk	1.13436
SO_0933	fba	fructose-bisphosphate aldolase class II Calvin cycle subtype Fba	1.03188
SO_0958	ahpC	alkyl hydroperoxide reductase peroxiredoxin component AhpC	1.22766
SO_0976	ohrA	peroxiredoxin OhrA	2.04165
SO_1047	lrgA	inner membrane protein LrgA	1.34196
SO_1048	lrgB	inner membrane protein LrgB	1.15112
SO_1053	SO_1053	phosphoenolpyruvate/pyruvate domain superfamily protein	1.02035
SO_1066	exeM	extracellular endonuclease ExeM	1.82972
SO_1140	dapB	dihydrodipicolinate reductase DapB	1.11152
SO_1188	SO_1188	inner membrane protein with PepSY TM helix	1.16015
SO_1189	SO_1189	putative periplasmic protein of unknown function DUF2271	1.16111
SO_1190	SO_1190	putative periplasmic CbiK superfamily protein	1.64415
SO_1191	greA	transcription elongation factor GreA	1.31635
SO_1214	SO_1214	Na+ dependent nucleoside transporter NupC family	2.74632
SO_1215	ompK	nucleoside-specific outer membrane porin OmpK	2.77929
SO_1217	deoC	deoxyribose-phosphate aldolase DeoC	2.14701
SO_1218	deoA	thymidine phosphorylase DeoA	1.34253
SO_1219	deoB	phosphopentomutase DeoB	1.35383
SO_1221	deoD	purine nucleoside phosphorylase DeoD	1.87619
SO_1307	aqpZ	aquaporin Z AqpZ	1.07095
SO_1412	SO_1412	outer membrane beta barrel protein	1.26712
SO_1482	SO_1482	TonB-dependent receptor	1.00474
SO_1487	SO_1487	putative lipoprotein	1.19283
SO_1489	SO_1489	putative cytoplasmic protein	1.20298
SO_1490	adhB	alcohol dehydrogenase II AdhB	2.00426
SO_1532	SO_1532	predicted periplasmic protein	2.9939
SO_1558	phoB	phosphate-responsive two component signal transduction system response regulator PhoB	1.51063
SO_1560	pstS	ABC-type phosphate uptake system substrate-binding component PstS	1.84491
SO_1563	SO_1563	cytoplasmic glutathione peroxidase	1.63319
SO_1580	SO_1580	TonB-dependent haem/haemoglobin receptor	1.00661
SO_1723	pstC	ABC-type high affinity phosphate uptake system permease component PstC	1.15471
SO_1784	feoB	ferrous iron transport protein B FeoB	1.02322
SO_1807	pspA	PspF antagonist PspA	1.43685
SO_1808	pspB	phage shock protein B PspB	1.18159
SO_1809	pspC	phage shock protein C PspC	1.15866
SO_1813	comEA	DNA competence protein ComEA	1.25376
SO_1855	rmf	ribosome modulation factor Rmf	1.13059
SO_1962	hppD	4-hydroxyphenylpyruvate dioxygenase HppD	2.21518
SO_1963	hmgA	homogentisate 1,2-dioxygenase HmgA	2.00311
SO_1977	SO_1977	inner membrane of unknown function DUF307	1.5728
SO_2001	ushA	bifunctional UDP-sugar hydrolase/5'-nucleotidase UshA	3.44053
SO_2045	SO_2045	cation efflux protein CDF family	1.09319
SO_2046	SO_2046	transcriptional regulator MarR family	1.07398
SO_2178	ccpA	diheme cytochrome c5 peroxidase CcpA	1.88165
SO_2194	pdsO	sortase system OmpA family protein PdsO	2.64282
SO_2195	SO_2195	inter-alpha-trypsin inhibitor family protein	1.89197
SO_2196	srtA	sortase SrtA	1.6478
SO_2203	dgkA	diacylglycerol kinase DgkA	1.00463
SO_2228	SO_2228	CBS domain containing protein	1.02206
SO_2269	fdx	ferredoxin 2Fe-2S type ISC system Fdx	1.01849
SO_2270	rimK	ribosomal protein S6 glutaminyl transferase RimK	1.40497
SO_2271	iscX	FeS assembly protein IscX	1.24852
SO_2274	ndk	nucleoside diphosphate kinase Ndk	1.06897
SO_2296	ribC	6,7-dimethyl-8-ribityllumazine synthase alpha subunit RibC	1.01365
SO_2297	SO_2297	hypothetical protein	1.06138
SO_2312	ecoT	serine protease inhibitor ecotin EcoT	1.13575
SO_2389	emrD	multidrug efflux protein EmrD	1.19346
SO_2424	SO_2424	zinc carboxypeptidase domain protein	1.10902
SO_2426	SO_2426	two component signal transduction system response regulator	1.52868
SO_2491	pykA	pyruvate kinase II PykA	1.35105
SO_2569	SO_2569	putative cytoplasmic protein	1.11581
SO_2572	ppiB	cytoplasmic peptidyl-prolyl cis-trans isomerase PpiB	1.01889
SO_2580	rnd	ribonuclease D Rnd	1.05251
SO_2653	ner	Mu phage transcriptional regulator Ner	1.20773
SO_2718	deoT	nucleoside sugar transporter DeoT	1.87028
SO_2719	deoD	purine nucleoside phosphorylase DeoD	1.76033
SO_2754	motY	smf-dependent flagellar motor protein MotY	1.01865
SO_2795	SO_2795	glyoxalase family protein	1.02088
SO_2797	SO_2797	glutaredoxin	1.12355
SO_2829	SO_2829	hypothetical protein	1.02195
SO_2841	SO_2841	hypothetical protein	1.60192
SO_2881	sodB	Fe/Mn superoxide dismutase SodB	1.18117
SO_2912	pflB	pyruvate formate-lyase PflB	1.35536
SO_2915	ackA	acetate kinase AckA	1.86465
SO_2916	pta	phosphate acetyltransferase Pta	1.99845
SO_2987	SO_2987	Lambda phage uncharacterized protein	1.02172
SO_2988	cII	Lambda phage phage regulatory protein CII	1.02334
SO_2989	cro	Lambda phage transcriptional repressor of early genes Cro	1.38169
SO_2993	SO_2993	Lambda phage type II DNA modification methyltransferase	1.45032
SO_2995	SO_2995	Lambda phage uncharacterized protein	1.20801
SO_2997	SO_2997	Lambda phage uncharacterized protein	1.30701
SO_2998	SO_2998	Lambda phage uncharacterized protein	1.63264
SO_2999	SO_2999	Lambda phage protein of unknown function DUF1317	1.17882
SO_3000	SO_3000	Lambda phage uncharacterized protein	1.40121
SO_3001	SO_3001	Lambda phage uncharacterized protein	1.29345
SO_3002	SO_3002	Lambda phage uncharacterized protein	1.3191
SO_3003	SO_3003	Lambda phage uncharacterized protein	1.49165
SO_3004	dam	Lambda phage type II restriction-modification system DNA N-6-adenine-methyltransferase Dam	1.60629
SO_3005	SO_3005	Lambda phage uncharacterized protein	1.48334
SO_3006	dcm	Lambda phage type II restriction modification system cytosine-5 DNA methyltransferase Dcm	1.48534
SO_3007	SO_3007	Lambda phage uncharacterized protein	1.03694
SO_3008	SO_3008	Lambda phage uncharacterized protein	1.14736
SO_3010	SO_3010	Lambda phage uncharacterized protein	1.36021
SO_3012	xis	Lambda phage DNA excisionase Xis	1.18906
SO_3030	pubA	putrescine monooxygenase PubA	2.06201
SO_3031	pubB	N-hydroxyputrescine-succinyl CoA transferase PubB	1.61419
SO_3032	pubC	NTP-dependent putrebactin synthetase PubC	1.88274
SO_3033	putA	TonB-dependent ferric putrebactin siderophore receptor PutA	2.01135
SO_3034	putB	ferric putrebactin reductase PutB	1.75541
SO_3062	SO_3062	predicted inner membrane protein	1.49528
SO_3159	wbfB	outer membrane protein of unknown function DUF940 WbfB	1.02946
SO_3284	ybgT	protein YbgT	1.15
SO_3285	cydB	cytochrome d ubiquinol oxidase subunit II CydB	1.02887
SO_3325	nrfJ	periplasmic protein of unknown function NrfJ	1.16779
SO_3328	SO_3328	acteyltransferase GNAT family	1.46417
SO_3344	SO_3344	predicted inner membrane protein	2.38113
SO_3370	yceI	UPF0312 family alkali-inducible periplasmic protein YceI	1.21785
SO_3371	yceJ	cytochrome B561 YceJ	1.17388
SO_3406	SO_3406	putative siderophore transporter component 1	1.34818
SO_3407	SO_3407	putative siderophore transporter component 2	2.29512
SO_3408	SO_3408	putative siderophore transporter component 3	2.47805
SO_3440	eno	enolase Eno	1.2863
SO_3542	xfp	D-xylulose 5-phosphate/D-fructose 6-phosphate phosphoketolase Xfp	1.28835
SO_3546	talB	transaldolase B TalB	1.08681
SO_3565	cpdB	bifunctional 2',3'-cyclic-nucleotide 2'-phosphodiesterase/3`-nucleotidase CpdB	1.11378
SO_3622	SO_3622	periplasmic RmlC-type Cupin domain family protein	1.11966
SO_3667	hmuZ	FMN binding heme iron utilization protein HmuZ	2.69119
SO_3668	hmuX	heme iron utilization protein HmuX	2.15089
SO_3669	hmuA	TonB-dependent heme/hemoglobin receptor HmuA	2.31994
SO_3670	tonB	TonB1 energy transduction system for heme uptake energy transducer component TonB	2.55568
SO_3671	exbB	TonB1 energy transduction system for heme uptake inner membrane component ExbB	2.56346
SO_3672	exbD	TonB1 energy transduction system for heme uptake inner membrane component ExbD	2.56895
SO_3673	hmuB	ABC-type hemin uptake system substrate-binding component HmuB	2.57856
SO_3674	hmuC	ABC-type hemin uptake system permease component HmuC	2.14351
SO_3675	hmuD	ABC-type hemin uptake system ATPase component HmuD	2.75998
SO_3676	SO_3676	protein of unknown function DUF2956	1.77159
SO_3681	SO_3681	universal stress protein family	1.25576
SO_3682	SO_3682	protein of unknown function DUF3478	1.1855
SO_3698	SO_3698	putative periplasmic protein	1.28341
SO_3713	SO_3713	hypothetical protein	1.44865
SO_3714	SO_3714	ABC-type monosaccharide transport system substrate binding component	1.75421
SO_3770	SO_3770	phosphate transport accessory protein of unknown function DUF47	1.10287
SO_3842	SO_3842	secreted low complexity protein	1.17253
SO_3847	SO_3847	cell wall assembly/cell proliferation coordinating protein KNR4-like protein	1.04306
SO_3900	SO_3900	enzyme of unknown function UPF0227	1.55921
SO_3909	SO_3909	predicted membrane protein	1.57084
SO_3910	SO_3910	putative periplasmic protein	1.67138
SO_3912	dusA	tRNA2fMet-dihydrouridine21 synthase DusA	1.02145
SO_3913	piuC	Fur regulated PKHD-type hydroxylase PiuC	2.22559
SO_3914	SO_3914	TonB-dependent siderophore receptor	1.88355
SO_3922	fdh	formate dehydrogenase cytochrome b Fdh	1.07984
SO_3923	hydG	Fe hydrogenase maturation rSAM protein HydG	1.01153
SO_3924	hydX	Fe hydrogenase assembly protein HydX	1.02339
SO_4069	SO_4069	SAM-dependent methyltransferase type 11	1.03708
SO_4070	yggE	periplasmic protein associated with oxidative stress YggE	1.57896
SO_4073	arfA	alternative ribosome-rescue factor ArfA	1.93033
SO_4126	SO_4126	hypothetical protein	1.44229
SO_4133	udp	uridine phosphorylase Udp	1.32593
SO_4134	SO_4134	protein of unknown function DUF465	1.09016
SO_4149	SO_4149	secreted VCBS domain protein	1.31476
SO_4196	SO_4196	predicted membrane protein	1.08171
SO_4208	hemB	delta-aminolevulinic acid dehydratase HemB	1.13757
SO_4292	pstS	ABC-type phosphate uptake system substrate-binding component PstS	1.52224
SO_4303	SO_4303	ATPase family protein associated with various cellular activities	1.0002
SO_4384	SO_4384	hypothetical protein	1.6103
SO_4414	kynA	tryptophan 2,3-dioxygenase KynA	1.07742
SO_4418	SO_4418	CHAP domain protein	1.26505
SO_4430	SO_4430	hypothetical protein	1.144
SO_4482	SO_4482	inner membrane protein of unknown function DUF2809	1.05429
SO_4483	SO_4483	cytochrome b	1.8577
SO_4484	shp	monoheme cytochrome c Shp	2.5718
SO_4485	dhc	diheme cytochrome c Dhc	2.22437
SO_4490	SO_4490	hypothetical protein	1.23454
SO_4516	SO_4516	TonB-dependent siderophore receptor	2.83648
SO_4524	SO_4524	transcriptional regulator LysR family	1.38149
SO_4554	SO_4554	DTW domain-containing protein	1.73268
SO_4555	SO_4555	drug:H+ antiporter DHA1 family	2.75089
SO_4558	SO_4558	hypothetical protein	1.18122
SO_4563	SO_4563	HDOD domain protein	1.33148
SO_4611	SO_4611	aa3 type cytochrome c oxidase biogenesis protein Surf1-like protein	1.02276
SO_4612	SO_4612	hypothetical protein	1.13293
SO_4613	ctaA	heme A synthase CtaA	1.06653
SO_4619	nfuA	iron-sulfur cluster biogenesis scaffold protein NfuA	1.15131
SO_4645	SO_4645	putative bifunctional autotransporter / extracellular effector	1.19501
SO_4649	SO_4649	histidine-rich protein of unknown function DUF3300	1.27933
SO_4706	SO_4706	malate synthase domain protein	1.88441
SO_4717	SO_4717	tungstate-responsive two component signal transduction system histidine kinase	1.28263
SO_4740	SO_4740	predicted membrane protein of unknown function DUF2061	1.80709
SO_4743	SO_4743	TonB-dependent siderophore receptor	1.37569
SO_A0007	SO_A0007	hypothetical protein	1.08537
SO_A0009	SO_A0009	hypothetical protein	1.15809
SO_A0108	SO_A0108	hypothetical protein	1.30882
SO_A0109	SO_A0109	hypothetical protein	1.27344
SO_A0122	SO_A0122	hypothetical protein	1.65549
