# Supplementary material
Source: publisher figshare collection journal article supplement (https://tandf.figshare.com/articles/dataset/_/5697283)
Supplement: Supplementary file 1 [file 1 › tbbb_a_1413326_sm2390.xlsx]

## Sheet: Supplementary Table 3
Supplementary Table 3. Down-regulated genes in ∆cpdA.
Locus tag	Gene	Description	log2FC
SO_0055	SO_0055	tetratricopeptide repeat-containing protein	-1.1501
SO_0085	SO_0085	predicted inner membrane protein	-1.53335
SO_0086	SO_0086	predicted membrane protein	-1.33043
SO_0093	SO_0093	Na+ dependent nucleoside transporter NupC family	-1.15679
SO_0101	fdnG	nitrate-inducible formate dehydrogenase molybdopterin-binding subunit FdnG	-2.43117
SO_0102	fdnH	nitrate-inducible formate dehydrogenase iron-sulfur subunit FdnH	-2.36414
SO_0103	fdnI	nitrate-inducible formate dehydrogenase cytochrome b subunit FdnI	-2.20592
SO_0104	fdhE	nitrate-inducible formate dehydrogenase chaperone FdhE	-1.81892
SO_0105	selA	L-seryl-tRNA selenium transferase SelA	-2.06592
SO_0106	selB	selenocysteine-specific translation elongation factor SelB	-1.98383
SO_0107	fdhD	formate dehydrogenase assembly/maturation protein FdhD	-1.43611
SO_0108	yedE	membrane protein of unknown function DUF395 YedE	-1.35676
SO_0109	yedF	SirA family protein YedF	-1.23673
SO_0141	SO_0141	nitrate/nitrite-responsive bifunctional diguanylate cyclase/phosphodiesterase with PAS sensory domain	-1.46078
SO_0273	SO_0273	lipoprotein of unknown function DUF1439	-1.2573
SO_0274	ppc	phosphoenolpyruvate carboxylase Ppc	-2.12742
SO_0276	argB	acetylglutamate kinase ArgB	-1.09342
SO_0388	SO_0388	integrase bacteriophage P4 family	-1.32047
SO_0454	SO_0454	protein of unknown function DUF1850	-1.63163
SO_0455	SO_0455	alpha-ketoglutarate uptake system bifunctional large and small subunit permease component	-1.93517
SO_0456	SO_0456	alpha-ketoglutarate uptake system substrate-binding component	-2.10959
SO_0496	SO_0496	glutathione synthetase ATP-binding domain-like superfamily protein	-1.01365
SO_0497	SO_0497	serine/threonine protein kinase	-1.08938
SO_0547	SO_0547	putative outer membrane protein TIGR02001 family	-1.03902
SO_0714	SO_0714	periplasmic monoheme cytochrome c4	-1.17835
SO_0715	sorA	sulfite dehydrogenase molybdopterin-binding subunit SorA	-1.06587
SO_0760	SO_0760	ammonium transporter channel family protein	-2.16374
SO_0761	glnK	regulatory protein for nitrogen assimilation GlnK	-2.39246
SO_0815	btuB	TonB-dependent vitamin B12 receptor BtuB	-1.26237
SO_0817	metR	transcription regulator of methionine biosynthesis MetR	-4.02494
SO_0818	metE	B12-independent 5-methyltetrahydropteroyltriglutamate--homocysteine methyltransferase MetE	-8.30148
SO_0849	napD	periplasmic nitrate reductase chaperone NapD	-1.15458
SO_0862	serA	D-3-phosphoglycerate dehydrogenase SerA	-1.9197
SO_0866	csgB	minor curlin subunit CsgB	-1.10052
SO_0867	SO_0867	collagenolytic serine protease	-1.95373
SO_0929	metK	S-adenosylmethionine synthetase MetK	-1.67478
SO_1030	metH	B12-dependent 5-methyltetrahydrofolate--homocysteine methyltransferase MetH	-4.15392
SO_1031	cobC	alpha-ribazole-5-phosphate phosphatase CobC	-2.86493
SO_1033	btuD	ABC-type cobalamin uptake system ATPase component BtuD	-1.76345
SO_1034	btuC	ABC-type cobalamin uptake system permease component BtuC	-1.32469
SO_1086	SO_1086	predicted inner membrane protein	-1.19832
SO_1087	metT	methionine:proton antiporter MetT	-4.43556
SO_1094	SO_1094	hypothetical protein	-1.54792
SO_1095	metY	O-acetylhomoserine (thiol)-lyase MetY	-2.95078
SO_1120	SO_1120	hypoxanthine/guanine permease AzgA family	-1.46844
SO_1121	proB	glutamate 5-kinase ProB	-1.17714
SO_1122	proA	gamma-glutamyl phosphate reductase ProA	-1.21789
SO_1127	dnaJ	chaperone protein DnaJ	-1.03318
SO_1258	SO_1258	adenylosuccinate synthetase	-1.86351
SO_1324	gltD	NADPH-dependent glutamate synthase small subunit GltD	-1.98695
SO_1325	gltB	NADPH-dependent glutamate synthase large subunit GltB	-2.03003
SO_1361	aroF	phospho-2-dehydro-3-deoxyheptonate aldolase tyr-sensitive AroF	-4.01044
SO_1362	tyrA	bifunctional chorismate mutase T/prephenate dehydrogenase TyrA	-3.79197
SO_1364	hcr	NADH oxidoreductase Hcr	-1.21632
SO_1367	pheA	multifunctional chorismate mutase P/prephenate dehydratase/DAHP synthetase PheA	-1.2552
SO_1389	SO_1389	ROK family protein	-1.18717
SO_1402	yheO	PAS sensory domain protein YheO	-1.55907
SO_1403	SO_1403	UPF0597 family protein	-1.49905
SO_1404	SO_1404	endoribonuclease L-PSP	-1.04607
SO_1417	SO_1417	two component signal transduction system histidine kinase	-1.11183
SO_1483	aceB	malate synthase A AceB	-3.19422
SO_1484	aceA	isocitrate lyase AceA	-2.91666
SO_1486	SO_1486	4-hydroxybenzoyl-CoA thioesterase family protein	-1.02952
SO_1493	malQ	4-alpha-glucanotransferase MalQ	-1.81451
SO_1494	glgB	1,4-alpha-glucan branching enzyme GlgB	-1.68931
SO_1495	glgX	glycogen isoamylase GlgX	-1.26056
SO_1496	glgP	glycogen phosphorylase GlgP	-1.40645
SO_1570	SO_1570	7TM intracellular signalling protein with GGDEF domain	-1.05911
SO_1669	tyrR	Sigma54-dependent transcriptional activator of amino acid degradation TyrR	-1.14183
SO_1676	metA	homoserine O-succinyltransferase MetA	-3.24888
SO_1677	ivdA	3-ketoacyl-CoA thiolase IvdA	-1.74201
SO_1678	ivdB	methylmalonate-semialdehyde dehydrogenase IvdB	-1.01771
SO_1681	ivdE	3-hydroxyisobutyryl-CoA hydrolase IvdE	-1.01789
SO_1699	SO_1699	transmembrane transcriptional regulator	-1.13572
SO_1717	SO_1717	putative lipoprotein	-1.20369
SO_1750	SO_1750	ABC-type transport system ATPase component	-1.11388
SO_1751	SO_1751	ABC-type transport system bifunctional permease and peptidase M1 family component	-1.14694
SO_1861	uvrC	excinuclease ABC C subunit UvrC	-1.03868
SO_1894	liuD	methylcrotonyl-CoA carboxylase biotin-binding subunit LiuD	-1.38404
SO_1895	liuC	methylglutaconyl-CoA hydratase LiuC	-1.20956
SO_1896	liuB	methylcrotonyl-CoA carboxylase carboxyl transferase subunit LiuB	-1.15668
SO_1898	liuR	transcriptional repressor of branched chain amino acid degradation LiuR	-1.19311
SO_1900	prpE	propionyl-CoA synthetase PrpE	-2.94792
SO_1917	SO_1917	major facilitator superfamily transporter required for growth on DMSO MFS superfamily	-2.89337
SO_1938	cobB	deacetylase of acetyl-CoA synthetase NAD-dependent CobB	-1.08103
SO_1939	SO_1939	hypothetical protein	-1.2429
SO_1947	SO_1947	hypothetical protein	-1.01557
SO_1952	ggtA	gamma-glutamyltransferase GgtA	-1.17355
SO_1957	SO_1957	predicted periplasmic protein	-1.02194
SO_1971	SO_1971	AMP-dependent synthetase and ligase family protein	-3.14193
SO_2002	SO_2002	predicted secreted protein	-1.01901
SO_2004	SO_2004	pseudo	-1.15649
SO_2017	SO_2017	heat shock response protein	-1.09774
SO_2064	SO_2064	membrane-anchored YbdH domain protein	-1.1751
SO_2065	tyrP	tyrosine transporter TyrP	-1.38178
SO_2067	hisIE	bifunctional phosphoribosyl-AMP cyclohydrolase/phosphoribosyl-ATP pyrophosphatase HisIE	-1.97831
SO_2068	hisF	imidazole glycerol phosphate synthase cyclase subunit HisF	-2.32621
SO_2069	hisA	1-(5-phosphoribosyl)-5-[(5-phosphoribosylamino)methylideneamino] imidazole-4-carboxamide isomerase HisA	-2.72431
SO_2070	hisH	imidazole glycerol phosphate synthase glutamine amidotransferase subunit HisH	-2.85218
SO_2071	hisB	bifunctional imidazoleglycerol-phosphate dehydratase/histidinol-phosphatase HisB	-2.95511
SO_2072	hisC	histidinol-phosphate aminotransferase HisC	-3.20385
SO_2073	hisD	histidinol dehydrogenase HisD	-2.90001
SO_2074	hisG	ATP phosphoribosyltransferase HisG	-1.70983
SO_2115	iaaA	bifunctional isoaspartyl dipeptidase / l-asparaginase IaaA	-1.02523
SO_2137	ychE	6TMS neutral amino acid transporter (NAAT) family protein YchE	-1.09677
SO_2138	SO_2138	pseudo	-1.45586
SO_2140	gadB	pseudo	-1.60992
SO_2278	ilvH	acetolactate synthase III small subunit IlvH	-2.76451
SO_2279	ilvI	acetolactate synthase III large subunit IlvI	-2.63629
SO_2282	SO_2282	bifunctional transcriptional repressor of amino acid efflux GntR family / aminotransferase	-1.05091
SO_2337	msrA	peptide methionine sulfoxide reductase MsrA	-2.22635
SO_2404	aroA	3-phosphoshikimate 1-carboxyvinyltransferase AroA	-1.45059
SO_2427	SO_2427	ArgR-regulated TonB-dependent receptor	-1.90725
SO_2440	thiH	thiazole biosynthesis protein ThiH	-3.13127
SO_2441	thiG	thiazole-phosphate synthase ThiG	-3.28489
SO_2442	thiS	sulphur carrier protein ThiS	-3.47343
SO_2443	thiF	adenylyltransferase ThiF	-3.50725
SO_2444	thiDE	bifunctional hydroxy-(phospho)methylpyrimidine kinase/thiamine-phosphate pyrophosphorylase ThiDE	-3.96002
SO_2445	thiC	thiamin biosynthesis protein ThiC	-4.35193
SO_2472	SO_2472	D-alanyl-D-alanine carboxypeptidase VanY family	-1.17786
SO_2644	ppsA	phosphoenolpyruvate synthase PpsA	-1.2028
SO_2715	SO_2715	thiamine-regulated TonB-dependent receptor	-1.00514
SO_2742	prlS	proline-responsive two component signal transduction system hybrid histidine kinase/resposne regulator PrlS	-1.00338
SO_2743	acs	acetyl-coenzyme A synthetase AcsA	-4.23988
SO_2767	asnB	asparagine synthase glutamine-hydrolyzing AsnB	-3.26959
SO_2805	nnrS	heme-copper-containing inner membrane protein NnrS	-1.14298
SO_2824	cstA	pseudo	-1.02365
SO_2843	sbcC	dsDNA exonuclease SbcC	-1.14666
SO_2844	sbcD	dsDNA exonuclease SbcD	-1.09223
SO_2854	SO_2854	hypothetical protein	-1.81239
SO_2855	SO_2855	exonuclease	-2.73622
SO_2856	SO_2856	putative nucleotidyltransferase DUF294	-3.22749
SO_2857	SO_2857	putative solute:sodium symporter large subunit	-4.80039
SO_2858	SO_2858	putative solute:sodium symporter small subunit	-4.51337
SO_2903	cysK	cysteine synthase CysK	-1.83331
SO_2918	SO_2918	hypothetical protein	-1.16135
SO_2952	M	Lambda phage minor tail protein M	-1.03697
SO_2953	H	Lambda phage tail length tape meausure protein H	-1.00204
SO_2964	SO_2964	Lambda phage head maturation protease	-1.09077
SO_2969	SO_2969	Lambda phage endonuclease HNH family	-1.01491
SO_3019	trpE	anthranilate synthase component I TrpE	-2.62235
SO_3020	trpG	anthranilate synthase component II glutamine amido-transferase TrpG	-2.71793
SO_3021	trpD	anthranilate phosphoribosyltransferase TrpD	-2.73997
SO_3022	trpCF	bifunctional indole-3-glycerolphosphate synthetase/phosphoribosylanthranilate isomerase TrpCF	-2.45044
SO_3023	trpB	tryptophan synthase beta subunit TrpB	-2.11865
SO_3024	trpA	tryptophan synthase alpha subunit TrpA	-1.81232
SO_3070	asd	aspartate semialdehyde dehydrogenese Asd	-1.65175
SO_3099	SO_3099	outer membrane long-chain fatty acid receptor FadL family	-1.35265
SO_3108	SO_3108	bifunctional 13-dimethyluroporphyrinogen III dehydrogenase/siroheme ferrochelatase	-1.19424
SO_3142	dcp	dipepidyl carboxypeptidase II Dcp	-1.19043
SO_3144	etfA	electron transfer flavoprotein alpha subunit EtfA	-2.01368
SO_3145	etfB	electron transfer flavoprotein beta subunit EtfB	-2.13653
SO_3148	SO_3148	periplasmic amidohydrolase family protein	-1.09884
SO_3149	SO_3149	periplasmic amidohydrolase family protein	-1.10368
SO_3155	SO_3155	phospholipase patatin family	-1.10807
SO_3268	SO_3268	flagellin modification glycoside hydrolase family 57	-1.27625
SO_3269	SO_3269	flagellin modification protein	-1.30003
SO_3334	SO_3334	diguanylate cyclase with HAMP domain	-1.13816
SO_3412	SO_3412	periplasmic solute binding protein	-1.83005
SO_3413	thrC	threonine synthase ThrC	-3.26522
SO_3414	thrB	homoserine kinase ThrB	-3.59101
SO_3415	thrA	bifunctional aspartokinase I / homoserine dehydrogenase I ThrA	-3.48612
SO_3461	SO_3461	transporter AEC family	-1.02775
SO_3471	glyA	serine hydroxymethyltransferase GlyA	-1.59563
SO_3562	SO_3562	proton/sodium:glutamate symporter DAACS family	-1.21493
SO_3598	cysM	cysteine synthase B CysM	-1.05771
SO_3599	cysP	ABC-type sulfate/thiosulfate uptake system substrate-binding component CysP	-2.41593
SO_3600	cysT	ABC-type sulfate/thiosulfate uptake system permease component 1 CysT	-1.90311
SO_3601	cysW	ABC-type sulfate/thiosulfate uptake system permease component 2 CysW	-1.68743
SO_3602	cysA	ABC-type sulfate/thiosulfate uptake system ATPase component CysA	-1.48372
SO_3685	csgG	curli secretion apparatus outer membrane lipoprotein component CsgG	-1.97965
SO_3686	csgF	curli secretion apparatus component CsgF	-1.95455
SO_3687	csgE	curli secretion apparatus substrate specificity factor CsgE	-1.80642
SO_3715	nfnB	bifunctional oxygen-insensitive NAD(P)H nitroreductase/dihydropteridine reductase NfnB	-2.21106
SO_3723	cysC	adenylylsulfate kinase CysC	-1.92897
SO_3724	SO_3724	pseudo	-2.25461
SO_3726	cysN	sulfate adenylyltransferase large subunit CysN	-2.53113
SO_3727	cysD	sulfate adenylyltransferase small subunit CysD	-3.33052
SO_3728	cysG	uroporphyrin-III C-methyltransferase CysG	-2.61297
SO_3736	cysH	phosphoadenylyl-sulfate reductase thioredoxin-dependent CysH	-2.8258
SO_3737	cysI	sulfite reductase (NADPH) siroheme FeS subunit CysI	-3.21071
SO_3738	cysJ	sulfite reductase (NADPH) flavoprotein subunit CysJ	-3.59803
SO_3740	pntA	NAD(P) transhydrogenase alpha subunit PntA	-1.51825
SO_3741	pntB	NAD(P) transhydrogenase beta subunit PntB	-1.27992
SO_3819	glnK	regulatory protein for nitrogen assimilation GlnK	-2.94116
SO_3820	amtB	pseudo	-2.54204
SO_3855	sfcA	NAD-dependent malate dehydrogenase (oxaloacetate-decarboxylating) SfcA	-1.13517
SO_3863	modA	ABC-type molybdate uptake system substrate-binding component ModA	-1.07803
SO_3864	modB	ABC-type molybdate uptake system permease component ModB	-1.65209
SO_3865	modC	ABC-type molybdate uptake system ATPase component ModC	-1.23494
SO_3901	cpdA	cyclic 3', 5'-adenosine monophosphate phosphodiesterase CpdA	-10.2706
SO_3985	dapA	dihydrodipicolinate synthase DapA	-1.1717
SO_3986	lysC	lysine-sensitive aspartokinase III LysC	-1.10635
SO_4054	metF	5,10-methylenetetrahydrofolate reductase MetF	-6.00783
SO_4055	metL	bifunctional aspartokinase II/homoserine dehydrogenase methionine-sensitive MetL	-5.99503
SO_4056	metB	cystathionine gamma-synthase MetB	-6.75918
SO_4057	metJ	transcriptional repressor of methionine metabolism MetJ	-1.17159
SO_4058	SO_4058	4-toluene sulfonate uptake permease family protein	-1.07196
SO_4180	mxdA	diguanylate cyclase-like protein MxdA	-1.21882
SO_4230	glpK	glycerol kinase GlpK	-1.03924
SO_4233	leuD	3-isopropylmalate dehydratase small subunit LeuD	-2.55647
SO_4234	leuC	3-isopropylmalate dehydratase large subunit LeuC	-2.46769
SO_4235	leuB	3-isopropylmalate dehydrogenase LeuB	-2.4016
SO_4236	leuA	2-isopropylmalate synthase LeuA	-1.90011
SO_4265	hsdM	type I restriction-modification system N6-adenine DNA methyltransferase HsdM	-1.24093
SO_4312	cyaA	adenylate cyclase CyaA	-1.12914
SO_4342	SO_4342	predicted lipoprotein	-1.36844
SO_4343	agxT	serine-pyruvate aminotransferase AgxT	-1.50752
SO_4344	ilvA	threonine dehydratase IlvA	-3.5521
SO_4345	ilvD	dihydroxy-acid dehydratase IlvD	-3.99041
SO_4346	ilvM	acetolactate synthase II small subunit IlvM	-4.24087
SO_4347	ilvG	acetolactate synthase II large subunit IlvG	-4.50986
SO_4348	ilvL	ilvGM operon attenuation leader peptide IlvL	-3.38215
SO_4349	ilvC	ketol-acid reductoisomerase IlvC	-4.64422
SO_4350	ilvY	acetohydroxybutyrate/acetolactate-responsive transcriptional regulator of isoleucine-valine biosynthesis IlvY	-1.01417
SO_4358	SO_4358	extracellular oxidoreductase molybdopterin-binding lipoprotein subunit	-1.15755
SO_4410	glnA	glutamine synthetase GlnA	-1.43017
SO_4471	glnL	nitrogen-responsive two component signal transduction system histidine kinase with PAS sensory domain GlnL	-1.93371
SO_4472	glnG	nitrogen-responsive two component signal transduction system Sigma54-dependent response regulator GlnG	-1.31186
SO_4480	exaC	NAD+-dependent acetaldehyde dehydrogenase ExaC	-4.32228
SO_4520	SO_4520	coproporphyrinogen III oxidase oxygen-independent	-1.11269
SO_4648	SO_4648	two component signal transduction system histidine kinase	-1.05405
SO_4650	SO_4650	alpha/beta hydrolase family of unknown function DUF1234	-2.95519
SO_4651	SO_4651	protein of unknown function DUF2292	-1.8691
SO_4652	sbp	ABC-type sulfate/thiosulfate uptakesystem substrate-binding subunit Sbp	-4.04538
SO_4653	cysT	ABC-type sulfate/thiosulfate uptakesystem permease component 1 CysT	-3.81801
SO_4654	cysW	ABC-type sulfate/thiosulfate uptakesystem permease component 2 CysW	-3.63193
SO_4655	cysA	ABC-type sulfate/thiosulfate uptakesystem ATPase component CysA	-2.71296
SO_4741	glmS	glutamine:fructose-6-phosphate transaminase (isomerizing) GlmS	-1.06687
SO_A0005	SO_A0005	hypothetical protein	-1.10544
SO_A0172	SO_A0172	resolvase family site-specific recombinase	-2.09429
